# Supplementary material for: Global transcriptome analysis reveals distinct bacterial response towards soluble and surface-immobilized antimicrobial peptide (Lasioglossin-III)
Source: Royal Society of Chemistry journal article supplement (doi:10.1039/c5ra14862f), 2015-01-01
Supplement: c5ra14862f2.xlsx [file c5ra14862f2.xlsx]

## Sheet: Table S1A
Important genes up-regulated in peptide (in solution form) treated bacteria
Entrez ID	Gene Symbol	Fold Change	Gene Name
Membrane associated genes
916988	ECs0629	4.53944	ECs0629
947276	ygdI	4.31304	Uncharacterized lipoprotein ygdI
915715	ECs4422	3.28595	Dipeptide transport system permease protein dppC
948778	mgtA	3.26891	Magnesium-transporting ATPase, P-type 1
948533	yjbF	3.22388	Uncharacterized lipoprotein yjbF
945450	ybjG	3.02608	Putative undecaprenyl-diphosphataseybjG
1036133	slyB	2.94371	Outer membrane lipoprotein slyB
945866	osmB	2.82027	Osmotically-inducible lipoprotein B
946350	yebO	2.7143	Uncharacterized protein yebO
947566	ybfB	2.64226	Uncharacterized protein ybfB
1450298	ytjA	2.6345	UPF0391 membrane protein ytjA
945455	dacC	2.55581	D-alanyl-D-alanine carboxypeptidasedacC
946326	phoQ	2.403	Sensor protein phoQ; Sensor protein
944967	ompX	2.34984	Outer membrane protein X
1036038	rstB	2.2731	Sensor protein; Sensor protein rstB
1036048	ydgA	2.214	Protein ydgA
945305	osmE	2.20445	Osmotically-inducible lipoprotein E
948879	yjjL	2.16813	Inner membrane transport protein yjjL
1039821	uhpT	2.14707	Hexose phosphate transport protein
948534	yjbE	2.11271	Protein psiE; Uncharacterized protein yjbE
948191	yidG	2.10017	Inner membrane protein yidG
948213	nepI	2.09667	Purine ribonucleoside efflux pump nepI
946693	lpxT	2.08836	Inner membrane protein yeiU
948174	yicO	2.06012	Putative permeaseyicO
946311	yeaQ	2.01415	UPF0410 protein yeaQ
945363	ybaT	2.00799	Inner membrane transport protein ybaT
945497	aqpZ	1.96633	Aquaporin Z
945070	ybaY	1.96175	Uncharacterized lipoprotein ybaY
915845	ECs4297	1.94156	sn-glycerol-3-phosphate transport system permease protein ugpE
948057	yhjV	1.86804	Inner membrane transport protein yhjV
946268	entS	1.86555	Enterobactin exporter entS
947611	yqjE	1.85036	Inner membrane protein yqjE
946427	fecA	1.80326	Fe(3+) dicitrate transport protein fecA
945131	ybbY	1.80118	Putative purine permeaseybbY
948092	yiaN	1.79562	2,3-diketo-L-gulonate TRAP transporter large permease protein yiaN
948202	yidX	1.7851	Uncharacterized protein yidX
944934	yafY	1.78009	Uncharacterized lipoprotein yafY
1036298	yagU	1.77752	Inner membrane protein yagU
945059	yfhR	1.74748	Uncharacterized protein yfhR
914416	ECs0317	1.73839	Inner membrane protein yagU
957676	eutH	1.72777	Ethanolamine utilization protein eutH
944745	yaaJ	1.72543	Uncharacterized transporter yaaJ
948670	blc	1.71688	Outer membrane lipoprotein blc
949111	fryC	1.70854	Fructose-like permease IIC component 1
948574	yjcH	1.67921	Inner membrane protein yjcH
947142	ybjE	1.65778	Uncharacterized protein ybjE
960675	gadB	1.63451	Glutamate decarboxylase beta
1036673	yhfT	1.6301	Uncharacterized protein yhfT
948008	uspB	1.62111	Universal stress protein B
948033	yhjD	1.61707	Inner membrane protein yhjD
949127	yohJ	1.60406	UPF0299 membrane protein yohJ
948190	yidH	1.60021	Inner membrane protein yidH
1037130	yjiY	1.59437	Inner membrane protein yjiY
945379	yahG	1.59258	Uncharacterized protein yahG
944793	setA	1.59123	Sugar efflux transporter A
1038007	yohC	1.58066	Inner membrane protein yohC
945525	ycaP	1.57692	UPF0702 transmembrane protein ycaP
946604	mdtA	1.57359	Multidrug resistance protein mdtA
948626	proP	1.57214	Proline/betaine transporter
947980	yhhT	1.57145	UPF0118 inner membrane protein yhhT
948580	nrfD	1.57077	Protein nrfD
915417	ECs4617	1.56899	Inner membrane protein yidH
945491	ybjP	1.55956	Uncharacterized lipoprotein ybjP
946978	uraA	1.55709	Uracil permease
946715	clcA	1.55338	H(+)/Cl(-) exchange transporter clcA
948527	yjbH	1.55332	Uncharacterized lipoprotein yjbH
1036639	yifK	1.55068	Probable transport protein yifK
1037908	yegM	1.54253	Multidrug resistance protein mdtA
946313	ompN	1.52589	Outer membrane protein N
1038764	yphA	1.51688	Inner membrane protein yphA
949083	lacY	1.51179	Lactose permease
945401	ybhL	1.51166	Inner membrane protein ybhL
948189	yidI	1.5106	Inner membrane protein yidI
947138	yqaE	1.50583	UPF0057 membrane protein yqaE
945790	chaA	1.50248	Calcium/proton antiporter
ABC Transporter related genes
945214	fepD	4.47914	Ferric enterobactin transport system permease protein fepD
948064	dppC	3.7284	Dipeptide transport system permease protein dppC
948625	phnE	3.14523
960019	phnD	2.55879	Phosphonates-binding periplasmic protein
948065	dppD	2.47915	Dipeptide transport ATP-binding protein dppD
948062	dppA	2.47378	Periplasmic dipeptide transport protein
948063	dppB	2.36336	Dipeptide transport system permease protein dppB
948056	dppF	2.32187	Dipeptide transport ATP-binding protein dppF
946681	osmF	2.30425	Putative osmoprotectant uptake system substrate-binding protein osmF
946659	yehX	2.22959	Putative osmoprotectant uptake system ATP-binding protein yehX
947953	ugpC	2.12559	sn-glycerol-3-phosphate import ATP-binding protein ugpC
948826	fecC	2.07224	Fe(3+) dicitrate transport system permease protein fecC
946816	fecD	2.03577	Fe(3+) dicitrate transport system permease protein fecD
945027	tauB	2.0329	Taurine import ATP-binding protein tauB
961635	ugpE	2.01804	sn-glycerol-3-phosphate transport system permease protein ugpE
946660	yehY	1.99746	Putative osmoprotectant uptake system permease protein yehY
945209	fepG	1.95801	Ferric enterobactin transport system permease protein fepG
947987	nikE	1.8786	Nickel import ATP-binding protein nikE
947957	ugpA	1.8642	sn-glycerol-3-phosphate transport system permease protein ugpA
945026	tauC	1.83507	Taurine transport system permease protein tauC
946838	fecB	1.68328	Fe(3+) dicitrate-binding periplasmic protein
949028	yehW	1.65087	Putative osmoprotectant uptake system permease protein yehW
945030	tauA	1.52715	Taurine-binding periplasmic protein
947962	ugpB	1.5059	sn-glycerol-3-phosphate-binding periplasmic protein ugpB
Oxidoreductase related genes
1039084	hycE	4.40058	Formatehydrogenlyase subunit 5
945710	yagS	3.75954	Putative xanthine dehydrogenase yagS FAD-binding subunit
945710	paoB	3.75954	Putative xanthine dehydrogenase yagS FAD-binding subunit
945643	rutA	3.14889	Putative monooxygenaserutA
946031	maeA	3.01975	NAD-dependent malic enzyme
944961	paoC	2.99047	Putative xanthine dehydrogenase yagR molybdenum-binding subunit
944961	yagR	2.99047	Putative xanthine dehydrogenase yagR molybdenum-binding subunit
947048	hycF	2.83118	Formatehydrogenlyase subunit 6
945579	hyaA	2.61709	Hydrogenase-1 small chain
945330	yagT	2.5496	Putative xanthine dehydrogenase yagT iron-sulfur-binding subunit
945330	paoA	2.5496	Putative xanthine dehydrogenase yagT iron-sulfur-binding subunit
948994	hycD	2.40361	Formatehydrogenlyase subunit 4
958381	poxB	2.29628	Pyruvate dehydrogenase [cytochrome]
948372	yihU	2.19603	Uncharacterized oxidoreductaseyihU
945101	dps	2.18692	DNA protection during starvation protein
948104	aldB	2.1353	Aldehyde dehydrogenase B
945298	hyfE	2.10261	Hydrogenase-4 component E
947191	hycG	2.08891	Formatehydrogenlyase subunit 7
958098	ygaF	2.0471	ECIAI39_2846
947290	hyfD	2.02084	Hydrogenase-4 component D
945876	prr	1.96539	Gamma-aminobutyraldehyde dehydrogenase
949126	yohF	1.94277	Uncharacterized oxidoreductaseyohF
946591	rutE	1.91897	Putative NADH dehydrogenase/NAD(P)H nitroreductaserutE
945327	hycC	1.89815	Formatehydrogenlyase subunit 3
948060	gabD	1.83926	Succinate-semialdehyde dehydrogenase [NADP+]
947495	dkgA	1.83369	2,5-diketo-D-gluconic acid reductase A
946234	katE	1.82516	Catalase HPII; Catalase
1040204	yhbW	1.81509	Uncharacterized protein yhbW
947088	norW	1.79721	Nitric oxide reductase FlRd-NAD(+) reductase
915242	ECs3346	1.79407	ECs3346
948802	yjgB	1.77167	Uncharacterized zinc-type alcohol dehydrogenase-like protein yjgB
946260	astD	1.76609	N-succinylglutamate 5-semialdehyde dehydrogenase
946043	osmC	1.76508	PeroxiredoxinosmC
948581	nrfC	1.76453	Protein nrfC
947003	puuC	1.76096	Gamma-glutamyl-gamma-aminobutyraldehyde dehydrogenase
960982	hydN	1.73781	Electron transport protein hydN
945072	puuB	1.71787	Gamma-glutamylputrescineoxidoreductase
945021	tauD	1.71077	Alpha-ketoglutarate-dependent taurinedioxygenase
959144	Z1507	1.70764	Putative NADH dehydrogenase/NAD(P)H nitroreductaserutE
948571	nrfA	1.70647	Cytochrome c-552
948432	metF	1.68574	Methylenetetrahydrofolate reductase; 5,10-methylenetetrahydrofolate reductase
944975	yahK	1.65392	Uncharacterized zinc-type alcohol dehydrogenase-like protein yahK
945458	dusC	1.6533	tRNA-dihydrouridine synthase C
949067	ybdR	1.64762	Uncharacterized zinc-type alcohol dehydrogenase-like protein ybdR
946036	adhP	1.64343	Alcohol dehydrogenase, propanol-preferring
915239	ECs3348	1.63975	ECs3348
948573	nrfB	1.63873	Cytochrome c-type protein nrfB
946962	hyfF	1.61947	Hydrogenase-4 component F
948710	aidB	1.6185	Protein aidB
945212	ybdH	1.61715	Uncharacterized oxidoreductaseybdH
948883	yjjN	1.60098	Uncharacterized zinc-type alcohol dehydrogenase-like protein yjjN
959545	hyfG	1.56524	Hydrogenase-4 component G
944798	leuB	1.54961	3-isopropylmalate dehydrogenase
915128	fadB	1.53901	Fatty acid oxidation complex subunit alpha
945445	ybiY	1.51885	Putative pyruvate formate-lyase 3-activating enzyme
945963	paaK	1.51475	Phenylacetate-coenzyme A ligase
912803	ECs1254	1.508	Putative NADH dehydrogenase/NAD(P)H nitroreductaserutE

## Sheet: Table S1B
Important genes down-regulated by the peptide (in solution form) treated bacteria
Entrez ID	Gene Symbol	Fold Change	Gene Name
Metabolism associated genes
1039793	hybA	2.21396	Hydrogenase-2 operon protein hybA
945902	hybO	2.17225	Hydrogenase-2 small chain
947182	hypE	2.11934	Hydrogenaseisoenzymes formation protein hypE
945957	ydeN	2.09434	Uncharacterized sulfataseydeN
1039092	HypB	2.08583	Hydrogenaseisoenzymes nickel incorporation protein hypB
947192	hypC	2.06786	Hydrogenaseisoenzymes formation protein hypC
948749	ydhY	2.05516	Uncharacterized ferredoxin-like protein ydhY
958190	hypD	2.0201	Hydrogenaseisoenzymes formation protein hypD
948937	srlD	1.98489	Sorbitol-6-phosphate 2-dehydrogenase
960158	murB	1.9382	UDP-N-acetylenolpyruvoylglucosamine reductase
945984	napH	1.9373	Ferredoxin-type protein napH
916296	hybD	1.92744	Hydrogenase 2 maturation protease
947262	sdaB	1.89221	L-serine dehydratase 2
1038597	ucpA	1.83477	OxidoreductaseucpA
945307	sucB	1.81432	Dihydrolipoyllysine-residue succinyltransferase component of 2-oxoglutarate dehydrogenase complex
947093	napA	1.79559	Periplasmic nitrate reductase
945544	NAPG	1.77639	Ferredoxin-type protein napG
948667	frdA	1.77544	Fumarate reductase flavoprotein subunit
946813	napF	1.73714	Ferredoxin-type protein napF
959675	yjjW	1.73216	Uncharacterized protein yjjW
1039055	gutQ	1.70863	Protein gutQ
1039165	ygcW	1.69161	Uncharacterized oxidoreductaseygcW
946769	lrhA	1.68216	Probable HTH-type transcriptional regulator lrhA
944854	lpd	1.67583	Dihydrolipoyl dehydrogenase
944753	dnaJ	1.66862	Chaperone protein dnaJ
948004	hybF	1.66678	Probable hydrogenase nickel incorporation protein hybF
945314	sucD	1.65821	Succinyl-CoA ligase [ADP-forming] subunit alpha
946913	yfeX	1.64624	Uncharacterized protein yfeX
946706	napC	1.64418	Cytochrome c-type protein napC
945789	yjiM	1.62756	Uncharacterized protein yjiM
1036831	ruvC	1.62657	Crossover junction endodeoxyribonucleaseruvC
948658	aspA	1.61398	Aspartate ammonia-lyase
948680	frdC	1.6048	Fumarate reductase subunit C
947068	yfiD	1.59484	Autonomous glycyl radical cofactor
948695	purA	1.59355	Adenylosuccinatesynthetase
945312	sucC	1.58829	Succinyl-CoA ligase [ADP-forming] subunit beta
1038699	guaB	1.58728	Inosine-5'-monophosphate dehydrogenase
945187	napD	1.58542	Protein napD
917779	ECs3370	1.58484	Inosine-5'-monophosphate dehydrogenase
946393	cheY	1.57307	Chemotaxis protein cheY
945702	icd	1.55396	Isocitrate dehydrogenase [NADP]
945808	narI	1.55102	Respiratory nitrate reductase 1 gamma chain
946746	nuoE	1.54449	NADH-quinoneoxidoreductase subunit E
1040442	fdoH	1.54266	Formate dehydrogenase-O iron-sulfur subunit
961098	gcvP	1.54117	Glycine dehydrogenase [decarboxylating]
944761	ileS	1.53756	Isoleucyl-tRNAsynthetase
945638	ynfG	1.53095	Probable anaerobic dimethyl sulfoxide reductase chain ynfG
946698	napB	1.52959	Diheme cytochrome c napB
948438	ykgE	1.52575	Uncharacterized protein ykgE
948756	ydhV	1.52421	Uncharacterized protein ydhV
945073	cyoE	1.52297	Protoheme IX farnesyltransferase
948668	frdD	1.52278	Fumarate reductase subunit D
945777	hemA	1.52132	Glutamyl-tRNA reductase
945064	ispA	1.51889	Geranyltranstransferase
948666	frdB	1.51577	Fumarate reductase iron-sulfur subunit
1035954	ynfE	1.51185	Putative dimethyl sulfoxide reductase chain ynfE
945120	ygcO	1.50923	Ferredoxin-like protein ygcO
947243	rumA	1.50916	23S rRNA (uracil-5-)-methyltransferaserumA
947854	mdh	1.5034	Malate dehydrogenase
948425	rpmE	1.50303	50S ribosomal protein L31
958486	tktA	1.50197	Transketolase 1
1040101	tdcE	1.50061	Keto-acid formateacetyltransferase
Cell Projection related genes
945647	flgG	3.68118	Flagellar basal-body rod protein flgG
945636	flgE	3.43993	Flagellar hook protein flgE
1039139	htrE	2.9609	Outer membrane usher protein htrE
946687	flgC	2.758	Flagellar basal-body rod protein flgC
945678	flgB	2.6287	Flagellar basal-body rod protein flgB
915703	ECs4431	2.54834	ECs4431
945813	flgD	2.53795	Basal-body rod modification protein flgD
1039535	papI	2.53442	UTI89_C4897
946451	fliG	2.50645	Flagellar motor switch protein fliG
945442	flhD	2.43499	Transcriptional activator flhD
948824	fliA	2.32768	RNA polymerase sigma factor; RNA polymerase sigma factor for flagellar operon
947280	flhC	2.22683	Flagellar transcriptional activator flhC
1037247	fimA	2.09093	Type-1 fimbrial protein, A chain
957523	Z3600	1.96915	Z3600
945639	flgF	1.89988	Flagellar basal-body rod protein flgF
912799	fliI	1.82694	Flagellum-specific ATP synthase
913688	ECs5273	1.81943	ECs5273
946454	fliJ	1.77772	FlagellarfliJ protein
946300	flgA	1.77691	Flagella basal body P-ring formation protein flgA
946442	fliM	1.69744	Flagellar motor switch protein fliM
949101	fliC	1.66559	Flagellin
1036698	yadC	1.63538	Uncharacterized fimbrial-like protein yadC
1039936	yqiH	1.62731	Uncharacterized fimbrial chaperone yqiH
946456	fliH	1.6086	Flagellar assembly protein fliH
915682	ECs3221	1.60448	ECs3221
946443	fliL	1.59893	FlagellarfliL protein
946392	cheZ	1.5978	Chemotaxis protein cheZ
1035005	csgA	1.57778	Major curlin subunit
912570	ECs2588	1.57683	ECs2588
946393	cheY	1.57307	Chemotaxis protein cheY
946448	fliF	1.54528	Flagellar M-ring protein
1036837	sfaC	1.51052	c1237; UTI89_C1107
956683	Z0024	1.5059	Z0024
Ribosomal genes
947807	rpmC	2.10003	50S ribosomal protein L29
947818	rplD	1.94403	50S ribosomal protein L4
947808	rpsQ	1.90977	30S ribosomal protein S17
947806	rplP	1.90276	50S ribosomal protein L16
947814	rpsC	1.89857	30S ribosomal protein S3
947819	rplW	1.89217	50S ribosomal protein L23
944759	rpsT	1.87387	30S ribosomal protein S20
947813	rplV	1.85035	50S ribosomal protein L22
947820	rplB	1.84126	50S ribosomal protein L2
947784	rplQ	1.83997	50S ribosomal protein L17
947096	rplS	1.83586	50S ribosomal protein L19
947817	rplC	1.82534	50S ribosomal protein L3
947791	rpsM	1.82451	30S ribosomal protein S13; 30S ribosomal protein
947811	rpsS	1.80501	30S ribosomal protein S19
947795	rpsE	1.79833	30S ribosomal protein S5
947797	rpmD	1.79104	50S ribosomal protein L30
947816	rpsJ	1.79081	30S ribosomal protein S10
948723	rpsF	1.78345	30S ribosomal protein S6
947793	rpsD	1.7772	30S ribosomal protein S4
947802	rpsH	1.75728	30S ribosomal protein S8
948484	rplK	1.75122	50S ribosomal protein L11
947792	rpsK	1.75083	30S ribosomal protein S11
947103	rpsP	1.72794	30S ribosomal protein S16
948483	rplA	1.72657	50S ribosomal protein L1
946349	rpmI	1.71557	50S ribosomal protein L35
947803	rplF	1.71115	50S ribosomal protein L6
947804	rplR	1.71067	50S ribosomal protein L18
947828	rplM	1.70617	50S ribosomal protein L13
947809	rplN	1.69811	50S ribosomal protein L14
949000	rpsI	1.6962	30S ribosomal protein S9
945152	rplT	1.69443	50S ribosomal protein L20
947798	rplO	1.68395	50S ribosomal protein L15
947801	rpsN	1.68141	30S ribosomal protein S14
947810	rplX	1.67422	50S ribosomal protein L24
946941	rpmB	1.67035	50S ribosomal protein L28
948490	rplJ	1.65938	50S ribosomal protein L10
947800	rplE	1.65337	50S ribosomal protein L5
945618	rplY	1.65072	50S ribosomal protein L25
949057	rplU	1.64925	50S ribosomal protein L21
947874	rpsB	1.64008	30S ribosomal protein S2
948489	rplL	1.6177	50S ribosomal protein L7/L12
947686	rpsO	1.56586	30S ribosomal protein S15
946318	rpmG	1.5586	50S ribosomal protein L33
945190	rpmA	1.51971	50S ribosomal protein L27
947846	rpsG	1.51183	30S ribosomal protein S7

## Sheet: Table S2
List of regulated bacterial genes in response to immobilized peptide
Gene ID	Gene Symbol	Regulation	Fold Change Absolute	Gene Name
Membrane Associated Genes
916413	ECs3771	down	1.53318	UPF0073 inner membrane protein yqfA
916587	ECs2885	up	1.61922	Putative multidrug resistance protein mdtD
916968	ECs0610	up	1.51465	Cation efflux system protein cusC
944750	dnaK	down	1.57869	Chaperone protein dnaK
944967	ompX	down	1.55271	Outer membrane protein X
945004	pal	down	1.58091	Peptidoglycan-associated lipoprotein
945180	fepE	up	1.50995	Ferric enterobactin transport protein fepE
945341	cydA	down	1.5867	Cytochrome d ubiquinol oxidase subunit 1
945347	cydB	down	1.57804	Cytochrome d ubiquinol oxidase subunit 2
945374	yajC	down	1.58809	UPF0092 membrane protein yajC
945554	ompF	down	1.59537	Outer membrane protein F
945571	ompA	down	1.53786	Outer membrane protein A
945870	fabI	down	1.51517	Enoyl-[acyl-carrier-protein] reductase [NADH]
946016	yccA	down	1.53659	Inner membrane protein yccA
946323	potA	down	1.54717	Spermidine/putrescine import ATP-binding protein potA
946450	ygiZ	up	1.53314	Inner membrane protein ygiZ
946555	wbbK	down	1.54649	Uncharacterized protein yefI
946655	nupX	up	1.52495	Nucleoside permeasenupX
946981	yfgM	down	1.50994	UPF0070 protein yfgM
947011	nlpD	down	1.54602	Lipoprotein nlpD
947381	yqfA	down	1.56629	UPF0073 inner membrane protein yqfA
948242	atpA	down	1.54467	ATP synthase subunit alpha
948244	atpD	down	1.51308	ATP synthase subunit beta
948253	atpE	down	1.5334	ATP synthase subunit c
948328	tatC	down	1.50636	Sec-independent protein translocase protein tatC
948482	tufB	down	1.61983	Elongation factor Tu; Elongation factor Tu 1
948697	hflC	down	1.54867	Protein hflC
948859	yjiJ	up	1.65864	Uncharacterized protein yjiJ
949098	gtrB	down	1.70373	Bactoprenolglucosyltransferase homolog from prophage CPS-53
949120	secF	down	1.53988	Protein-export membrane protein secF
1034971	yahC	up	1.55323	Uncharacterized protein yahC
1035409	dadA	down	1.6004	D-amino acid dehydrogenase small subunit
1035560	pspA	down	1.5941	Phage shock protein A
1035577	ompG	up	1.54721	Outer membrane protein G
1038560	yddR	down	1.60818	EcSMS35_1687; ECH74115_2098; c5080; UTI89_C4673; EcHS_A1571; APECO1_2374
1038621	eutH	down	1.50337	Ethanolamine utilization protein eutH
1039964	ygjE	up	1.55687	L-tartrate/succinate antiporter
Metal Binding Genes
945294	araD	up	1.53527	L-ribulose-5-phosphate 4-epimerase
945406	citE	up	1.50499	Citrate lyase subunit beta
946880	crr	down	1.73283	Glucose-specific phosphotransferase enzyme IIA component
912575	ECs1120	down	1.54944	Superoxide dismutase [Cu-Zn]
916192	ECs3944	up	1.58645	L(+)-tartrate dehydratase subunit alpha
945295	fur	down	1.50915	Ferric uptake regulation protein
945076	LeuC	down	1.54616	3-isopropylmalate dehydratase large subunit
946031	maeA	down	1.55337	NAD-dependent malic enzyme
961563	manA	down	1.60541	Mannose-6-phosphate isomerase
947188	msrB	down	1.53019	Peptide methionine sulfoxide reductase msrB
948748	ppa	down	1.58089	Inorganic pyrophosphatase
947196	pphB	up	1.53861	Serine/threonine-protein phosphatase 2
946879	ptsI	down	1.67907	Phosphoenolpyruvate-protein phosphotransferase
946646	rihB	up	1.56713	Pyrimidine-specific ribonucleoside hydrolase rihB
947859	slyD	down	1.59917	FKBP-type peptidyl-prolylcis-trans isomeraseslyD
949130	tgt	down	1.60189	QueuinetRNA-ribosyltransferase
958530	ttdA	up	1.66508	L(+)-tartrate dehydratase subunit alpha
Protein Metabolism
947847	fusA	down	1.53223	Elongation factor G
948080	glyS	down	1.59099	Glycyl-tRNAsynthetase beta subunit
946225	infC	down	1.52512	Translation initiation factor IF-3
946223	pheS	down	1.56038	Phenylalanyl-tRNAsynthetase alpha chain
947820	rplB	down	1.64292	50S ribosomal protein L2
947817	rplC	down	1.50102	50S ribosomal protein L3
947818	rplD	down	1.56817	50S ribosomal protein L4
947096	rplS	down	1.58088	50S ribosomal protein L19
945152	rplT	down	1.63414	50S ribosomal protein L20
947819	rplW	down	1.62746	50S ribosomal protein L23
947810	rplX	down	1.56102	50S ribosomal protein L24
1038122	rplY	down	1.54586	50S ribosomal protein L25
947807	rpmC	down	1.58822	50S ribosomal protein L29
948425	rpmE	down	1.77428	50S ribosomal protein L31
946318	rpmG	down	1.80701	50S ribosomal protein L33
946349	rpmI	down	1.72919	50S ribosomal protein L35
947874	rpsB	down	1.53613	30S ribosomal protein S2
947795	rpsE	down	1.61586	30S ribosomal protein S5
949000	rpsI	down	1.5016	30S ribosomal protein S9
947845	rpsL	down	1.62344	30S ribosomal protein S12
947801	rpsN	down	1.56091	30S ribosomal protein S14
947686	rpsO	down	1.6718	30S ribosomal protein S15
947808	rpsQ	down	1.69269	30S ribosomal protein S17
947811	rpsS	down	1.51798	30S ribosomal protein S19
944759	rpsT	down	1.61752	30S ribosomal protein S20
947577	rpsU	down	1.6244	30S ribosomal protein S21
946222	thrS	down	1.62431	Threonyl-tRNAsynthetase
944866	tsf	down	1.59545	Elongation factor Ts
947838	tufA	down	1.58964	Elongation factor Tu 2; Elongation factor Tu; Elongation factor Tu 1
Genes associated with Nucleotide Binding
944895	accA	down	1.66321	Acetyl-coenzyme A carboxylase carboxyl transferase subunit alpha
946775	ackA	down	1.52796	Acetate kinase
945097	adk	down	1.53598	Adenylate kinase
947867	crp	down	1.50996	Catabolite gene activator
946983	der	down	1.80591	GTP-binding protein engA
945105	dnaX	down	1.53168	DNA polymerase III subunit tau
914884	ECs3442	down	1.68349	ECs3442
915884	ECs4260	down	1.63019	HTH-type transcriptional regulator malT
948665	groL	down	1.68595	60 kDachaperonin
1036838	malT	down	1.69415	HTH-type transcriptional regulator malT
948690	miaA	down	1.54723	tRNA Delta(2)-isopentenylpyrophosphatetransferase
945772	prs	down	1.92219	Ribose-phosphate pyrophosphokinase
945153	purK	down	1.52217	Phosphoribosylaminoimidazole carboxylase ATPase subunit
946368	purT	down	1.65298	Phosphoribosylglycinamideformyltransferase 2
948290	rhlB	down	1.61254	ATP-dependent RNA helicase rhlB
959293	srmB	down	1.63377	ATP-dependent RNA helicase srmB
945862	topA	down	1.617	DNA topoisomerase 1
948369	typA	down	1.6521	GTP-binding protein typA/BipA; GTP-binding protein typA/bipA
946656	yehL	up	1.59314	Uncharacterized protein yehL
